# Supplementary material for: Regional variations in incidence and treatment trends of Achilles tendon ruptures in Finland: a nationwide study
Source: PubMed Central journal article supplement (PMC11253709; doi:10.2340/17453674.2024.41089), 2024-07-17
Supplement: ActaO-95-41089-s1.pdf [file ActaO-95-41089-s1.pdf]

Supplement Table 4. Non-surgical proportion

| year                            | Central Finland | Central Ostrobothnia | East Savo | Helsinki and Uusimaa | Kainuu | Kanta-Häme | Kymenlaakso | Lapland | Länsi-Pohja | North Karelia | North Savo | Northern Ostrobothnia | Pirkanmaa | Päijät-Häme | Satakunta | South Karelia | South Ostrobothnia | South Savo | Southwest Finland | Vaasa | Åland |
|---------------------------------|-----------------|----------------------|-----------|----------------------|--------|------------|-------------|---------|-------------|---------------|------------|-----------------------|-----------|-------------|-----------|---------------|--------------------|------------|-------------------|-------|-------|
| 1997                            | 20              | 27                   | 50        | 21                   | 8      | 15         | 24          | 60      | 18          | 55            | 13         | 20                    | 13        | 35          | 12        | 21            | 24                 | 29         | 16                | 7     | 67    |
| 1998                            | 26              | 74                   | 0         | 32                   | 33     | 31         | 25          | 45      | 27          | 55            | 43         | 35                    | 23        | 70          | 21        | 26            | 28                 | 26         | 26                | 23    | 100   |
| 1999                            | 23              | 59                   | 0         | 29                   | 50     | 36         | 23          | 31      | 14          | 17            | 38         | 8                     | 27        | 33          | 28        | 29            | 26                 | 6          | 26                | 22    | 50    |
| 2000                            | 46              | 33                   | 80        | 32                   | 13     | 29         | 27          | 10      | 50          | 18            | 27         | 45                    | 30        | 33          | 21        | 40            | 25                 | 31         | 31                | 19    | 0     |
| 2001                            | 36              | 42                   | 50        | 26                   | 42     | 32         | 38          | 46      | 17          | 31            | 30         | 24                    | 30        | 30          | 22        | 22            | 4                  | 29         | 23                | 13    | 29    |
| 2002                            | 43              | 38                   | 55        | 34                   | 32     | 37         | 19          | 44      | 33          | 45            | 39         | 32                    | 30        | 31          | 15        | 33            | 24                 | 5          | 21                | 29    | 13    |
| 2003                            | 30              | 28                   | 25        | 29                   | 50     | 24         | 28          | 22      | 47          | 44            | 24         | 35                    | 27        | 19          | 23        | 35            | 13                 | 13         | 25                | 30    | 20    |
| 2004                            | 42              | 47                   | 46        | 33                   | 33     | 29         | 34          | 39      | 33          | 36            | 33         | 25                    | 28        | 31          | 34        | 33            | 24                 | 27         | 29                | 25    | 50    |
| 2005                            | 53              | 11                   | 32        | 41                   | 73     | 37         | 29          | 29      | 13          | 47            | 38         | 29                    | 35        | 34          | 30        | 49            | 37                 | 25         | 33                | 30    | 13    |
| 2006                            | 40              | 41                   | 15        | 46                   | 64     | 40         | 40          | 48      | 17          | 44            | 43         | 35                    | 31        | 31          | 38        | 31            | 30                 | 13         | 22                | 47    | 10    |
| 2007                            | 44              | 50                   | 43        | 43                   | 35     | 38         | 25          | 37      | 38          | 38            | 24         | 35                    | 24        | 29          | 32        | 46            | 40                 | 56         | 27                | 50    | 33    |
| 2008                            | 55              | 50                   | 53        | 51                   | 47     | 62         | 47          | 52      | 33          | 43            | 41         | 48                    | 34        | 41          | 27        | 35            | 42                 | 29         | 37                | 38    | 33    |
| 2009                            | 60              | 31                   | 40        | 52                   | 35     | 53         | 39          | 48      | 21          | 25            | 45         | 64                    | 48        | 50          | 32        | 48            | 49                 | 35         | 55                | 33    | 40    |
| 2010                            | 62              | 68                   | 55        | 53                   | 48     | 51         | 42          | 67      | 38          | 44            | 46         | 62                    | 45        | 62          | 52        | 60            | 36                 | 38         | 58                | 43    | 75    |
| 2011                            | 74              | 41                   | 61        | 65                   | 74     | 61         | 38          | 74      | 45          | 71            | 78         | 70                    | 66        | 72          | 54        | 74            | 83                 | 56         | 64                | 50    | 40    |
| 2012                            | 78              | 61                   | 78        | 74                   | 80     | 67         | 55          | 98      | 96          | 83            | 76         | 78                    | 68        | 73          | 52        | 87            | 84                 | 79         | 60                | 63    | 58    |
| 2013                            | 83              | 65                   | 71        | 77                   | 80     | 57         | 65          | 91      | 86          | 90            | 83         | 78                    | 66        | 80          | 70        | 82            | 83                 | 88         | 69                | 76    | 100   |
| 2014                            | 94              | 82                   | 100       | 78                   | 82     | 73         | 81          | 93      | 94          | 90            | 86         | 89                    | 85        | 77          | 70        | 78            | 76                 | 90         | 75                | 73    | 76    |
| 2015                            | 88              | 71                   | 93        | 78                   | 94     | 82         | 88          | 97      | 94          | 76            | 78         | 86                    | 77        | 88          | 68        | 77            | 81                 | 86         | 66                | 77    | 75    |
| 2016                            | 88              | 67                   | 90        | 84                   | 73     | 71         | 85          | 93      | 93          | 86            | 88         | 92                    | 85        | 89          | 60        | 79            | 71                 | 88         | 74                | 72    | 80    |
| 2017                            | 93              | 79                   | 93        | 82                   | 91     | 76         | 86          | 90      | 95          | 94            | 90         | 88                    | 86        | 84          | 81        | 93            | 80                 | 90         | 88                | 90    | 78    |
| 2018                            | 88              | 76                   | 91        | 80                   | 90     | 86         | 86          | 91      | 94          | 94            | 91         | 93                    | 83        | 89          | 85        | 97            | 84                 | 96         | 77                | 88    | 92    |
| 2019                            | 93              | 82                   | 100       | 81                   | 100    | 87         | 90          | 97      | 100         | 92            | 97         | 85                    | 83        | 85          | 81        | 85            | 95                 | 92         | 73                | 88    | 100   |
| Change 2019-1997 (%-points)     | 73              | 56                   | 50        | 60                   | 92     | 72         | 66          | 37      | 82          | 37            | 84         | 65                    | 70        | 51          | 69        | 63            | 71                 | 62         | 57                | 81    | 33    |
| Proportion in 2019 vs. 1997 (%) | 363             | 209                  | 100       | 288                  | 1100   | 482        | 278         | 61      | 450         | 68            | 643        | 332                   | 545       | 147         | 600       | 296           | 297                | 212        | 354               | 1093  | 50    |
